# Supplementary material
Source: PubMed Central journal article supplement (PMC7833127)
Supplement: mmc1.pdf [file mmc1.pdf]

Supplementary Materials for:

**Paper Biosensors for Detecting Elevated IL-6 Levels in Blood and Respiratory Samples from COVID-19 patients**

Cristina Adrover-Jaume,<sup>‡a,b</sup> Alejandra Alba-Patiño,<sup>‡a,b</sup> Antonio Clemente,<sup>a,\*</sup> Giulia Santopolo,<sup>a,b</sup> Andreu Vaquer,<sup>a</sup> Steven M. Russell,<sup>a</sup> Enrique Barón,<sup>a</sup> María del Mar González del Campo,<sup>a</sup> Joana M. Ferrer,<sup>d,e</sup> María Berman-Riu,<sup>d</sup> Mercedes García-Gasalla,<sup>f</sup> María Aranda,<sup>a,c</sup> Marcio Borges,<sup>a,c</sup> Roberto de la Rica.<sup>a,b,\*</sup>

<sup>a</sup> Multidisciplinary Sepsis Group, Health Research Institute of the Balearic Islands (IdISBa), Son Espases University Hospital, 07120 Palma de Mallorca, Spain.

<sup>b</sup> University of the Balearic Islands, Chemistry Department, Cra. de Valldemossa km 7.5, 07122 Palma de Mallorca, Spain.

<sup>c</sup> Multidisciplinary Sepsis Unit, ICU, Son Llàtzer University Hospital, 07198 Palma de Mallorca, Spain

<sup>d</sup> Immune Response in Human Pathology Group, Health Research Institute of the Balearic Islands (IdISBa)

<sup>e</sup> Immunology Department, Son Espases University Hospital, 07120 Palma de Mallorca, Spain Son Espases University Hospital, 07120 Palma de Mallorca, Spain.

<sup>f</sup> Infectious Diseases-HIV Group, Health Research Institute of the Balearic Islands (IdISBa), Son Espases University Hospital, 07120 Palma de Mallorca, Spain.

**Table S1:** Limit of detection (LOD) and dynamic range of previously proposed biosensors for IL-6 detection

| Ref | Technique                       | Detection                                  | Support                                                           | Instrumental                                                |                            |                                                  | Analysis time         |
|-----|---------------------------------|--------------------------------------------|-------------------------------------------------------------------|-------------------------------------------------------------|----------------------------|--------------------------------------------------|-----------------------|
|     |                                 |                                            |                                                                   | LOD                                                         | Matrix                     | Dynamic range                                    |                       |
| 1   | Aptamers                        | Conductance                                | Carbon nanotube                                                   | 1 pg mL <sup>-1</sup>                                       | PBS                        | 1 pg mL <sup>-1</sup> – 10 ng mL <sup>-1</sup>   | Real-time             |
| 2   | Immunosensor and aptamer        | Electrochemical                            | Organic Field Effect Transistors                                  | 20 pg mL <sup>-1</sup>                                      | PBS                        | 20 pg mL <sup>-1</sup> – 210 ng mL <sup>-1</sup> | -                     |
| 3   | Immunosensor                    | ELISA                                      | Ultrafiltration regenerated cellulose membranes (RC)              | 31 pg mL <sup>-1</sup>                                      | PBS                        | 31 – 500 pg mL <sup>-1</sup>                     | 2 h                   |
| 4   | Immunosensor                    | Naked eye Optical spectroscopy             | Magnetic nanoparticles (MNPs) and polystyrene (PS) microparticles | 11 pg mL <sup>-1</sup> eye<br>1.2 pg mL <sup>-1</sup> instr | PBS                        | 3.7 – 900 pg mL <sup>-1</sup>                    | 1 h                   |
| 5   | Immunosensor                    | Chemiluminescence                          | Polydimethylsiloxane (PDMS)                                       | 1.0 pg mL <sup>-1</sup>                                     | PBS (30% fetal calf serum) | 5 – 1280 pg mL <sup>-1</sup>                     | 90 min                |
| 6   | Immunosensor                    | Localized-surface plasmon resonance (LSPR) | Gold nanorod                                                      | 10 pg mL <sup>-1</sup>                                      | PBS                        | 10 – 10 000 pg mL <sup>-1</sup>                  | 30 min                |
| 7   | Immunosensor                    | Electrochemical                            | Silicon nanowire field effect transistor                          | -                                                           | PBS                        | 5 – 50000 pg mL <sup>-1</sup>                    | Real-time             |
| 8   | Immunosensor                    | Fluorescence                               | Optical fiber                                                     | 0.1 pg mL <sup>-1</sup>                                     | PBS                        | 0.4 – 400 pg mL <sup>-1</sup>                    | 60 min                |
| 9   | Immunosensor                    | Electrochemical                            | Graphene oxides                                                   | 5 pg mL <sup>-1</sup>                                       | PBS                        | 5 – 150 pg mL <sup>-1</sup>                      | 30 min                |
| 10  | Immunosensor                    | Electrochemical                            | Gold electrode                                                    | 220 pg mL <sup>-1</sup>                                     | PBS                        | -                                                | 60 min<br>10 s signal |
| 11  | Immunosensor                    | Electrochemical                            | Gold electrode                                                    | 4 pg mL <sup>-1</sup>                                       | PBS                        | -                                                | >110 min              |
| 12  | Oligonucleotides and antibodies | Optical                                    | Silica wafers coated with Ti/Au                                   | 88 µg mL <sup>-1</sup>                                      | PBS and SSC                | -                                                | -                     |
| 13  | Immunosensor                    | Surface-enhanced Raman scattering (SERS)   | Paper and DTNB on gold nano shell with a silica core              | 1 pg mL <sup>-1</sup>                                       | PBS                        | 1 pg mL <sup>-1</sup> – 1 µg mL <sup>-1</sup>    | -                     |

|                  |                                          |                                            |                                                                                        |                                           |            |                                                             |                |
|------------------|------------------------------------------|--------------------------------------------|----------------------------------------------------------------------------------------|-------------------------------------------|------------|-------------------------------------------------------------|----------------|
| 14               | Aptasensor                               | Electrochemical                            | Glassy carbon electrode modified with p-aminobenzoic acid, p-aminothiophenol and AuNPs | 1.6 pg mL <sup>-1</sup>                   | PBS        | 5 pg mL <sup>-1</sup> – 100 ng mL <sup>-1</sup>             | >60 min        |
| 14               | Immunosensor                             | Electrochemical                            | Magnetic microparticles and planar graphite-screen printed electrodes                  | 0.3 pg mL <sup>-1</sup>                   | PBS        | 1 pg mL <sup>-1</sup> – 1 µg mL <sup>-1</sup>               | 30 - 60 min    |
| 15               | Immunosensor                             | Fluorescence                               | Nitrocellulose<br>PVC<br>Glass fiber                                                   | 0.37 pg mL <sup>-1</sup>                  | PBST-BSA   | 2 – 500 pg mL <sup>-1</sup>                                 | 15 min         |
| 16               | Immunosensor                             | Fluorescence spectroscopy                  | Nitrocellulose                                                                         | 0.9 pg mL <sup>-1</sup>                   | PBS        | 1 – 1000 pg mL <sup>-1</sup>                                | 30 min         |
| 17               | Aptameric GFET (field effect transistor) | Electrochemical                            | Graphene                                                                               | 210 pg mL <sup>-1</sup>                   | PBS        | 1 – 16 ng mL <sup>-1</sup>                                  | 6 min          |
| 18               | Immunosensor                             | Differential pulse voltammetry             | Tl:Au on silicon substrate                                                             | 20 pg mL <sup>-1</sup>                    | PBS        | 0 – 60 pg mL <sup>-1</sup>                                  | 2.5 min        |
| 19               | Immunosensor                             | Chemiluminescence                          | Optical fiber                                                                          | 1.05 pg mL <sup>-1</sup>                  | PBS        | 5 – 10 000 pg mL <sup>-1</sup>                              | >75 min        |
| 20               | Immunosensor                             | Electrochemical                            | Indium tin oxide (ITO) electrode                                                       | 6.0 fg mL <sup>-1</sup>                   | PBS        | 0.02 – 16 pg mL <sup>-1</sup>                               | >30 min        |
| 21               | Immunosensor                             | Colorimetric                               | Plasmonic nanoprobe and paper                                                          | 0.1 pg mL <sup>-1</sup>                   | PBS        | ---                                                         | 17 min         |
| 22               | Immunosensor                             | Localized-surface plasmon resonance (LSPR) | Poly(pyrrole N-hydroxy succinimide)                                                    | 10 fg mL <sup>-1</sup>                    | PBS        | 0.03 – 22.5 pg mL <sup>-1</sup>                             | -              |
| 23               | Multiplexed immunosensor                 | LSPR                                       | glass                                                                                  | 11.29 pg mL <sup>-1</sup>                 | PBS        | 10 – 10 <sup>4</sup> pg mL <sup>-1</sup>                    | 40 min         |
| 24               | Microfluidic immunoarray                 | electrochemical                            | gold                                                                                   | 0.05 to 2 pg mL <sup>-1</sup>             | serum      | sub pg mL <sup>-1</sup> to well above ng mL <sup>-1</sup> ) | <60 min        |
| <b>This work</b> | <b>Immunosensor</b>                      | <b>Colorimetric</b>                        | <b>Paper/AuNPs</b>                                                                     | <b>10<sup>-3</sup> pg mL<sup>-1</sup></b> | <b>PBS</b> | <b>10<sup>-3</sup> – 10<sup>2</sup> pg mL<sup>-1</sup></b>  | <b>7-8 min</b> |

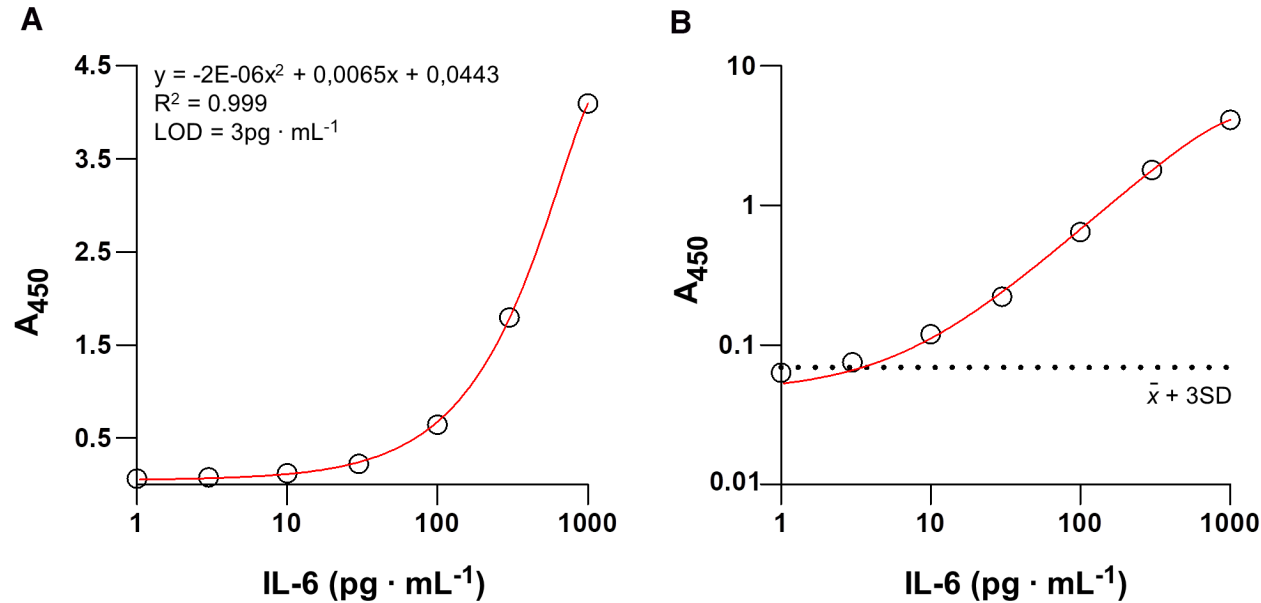

**Figure S1.** Calibration plot for IL-6 detection with an in-house ELISA in semi-logarithmic (A) or log-log (B) scale. The calibration plot was obtained as follows. A 96-well ELISA microplate (Thermo Scientific) was coated with 100  $\mu\text{l}$  of mouse anti-human interleukin-6 (IL-6) monoclonal capture antibody (Abcam) at  $1 \mu\text{g} \cdot \text{mL}^{-1}$  in bicarbonate buffer (0.1 M, pH 9.6). After overnight incubation at 4 °C, wells were washed 3 times with PBS containing 0.1% Tween 20 (PBST), blocked during 2 h at 37 °C with PBS containing 2% of bovine serum albumin (BSA) and washed again 3 times with PBST. The calibration curve was obtained by adding 100  $\mu\text{l}$  of IL-6 solutions to coated wells and incubated 2h at room temperature (RT) in a swinging shaker. IL-6 solutions were also applied to wells without capture antibodies in order to subtract non-specific signals. Each sample was assayed in triplicate. Next, plates were washed 3 times with PBST and then 100  $\mu\text{L}$  of biotinylated mouse anti-human IL-6 monoclonal detection antibody (Sigma-Aldrich) at  $10 \mu\text{g} \cdot \text{mL}^{-1}$  in PBST-BSA 1% was added. After 2h of incubation at RT in a swinging shaker, plates were washed 5 times with PBST and 100  $\mu\text{L}$  of streptavidin-HRP diluted 1:1000 in 1% PBST-BSA was added for 30 min at RT. Then, plates were washed again 5 times with PBST and 100  $\mu\text{L}$  of ready-to-use 1-Step Ultra TMB (Thermo Scientific) was added for

30 min at RT. Finally, the colorimetric reaction was stopped with 100  $\mu\text{L}$  of 2N  $\text{H}_2\text{SO}_4$ , and absorbance was measured at 450 nm. Absorbance was read with a Biotek power wave plate reader. The limit of detection expressed as the sample that yields a signal above three times the standard deviation of the blank is 3  $\text{pg}\cdot\text{mL}^{-1}$ .

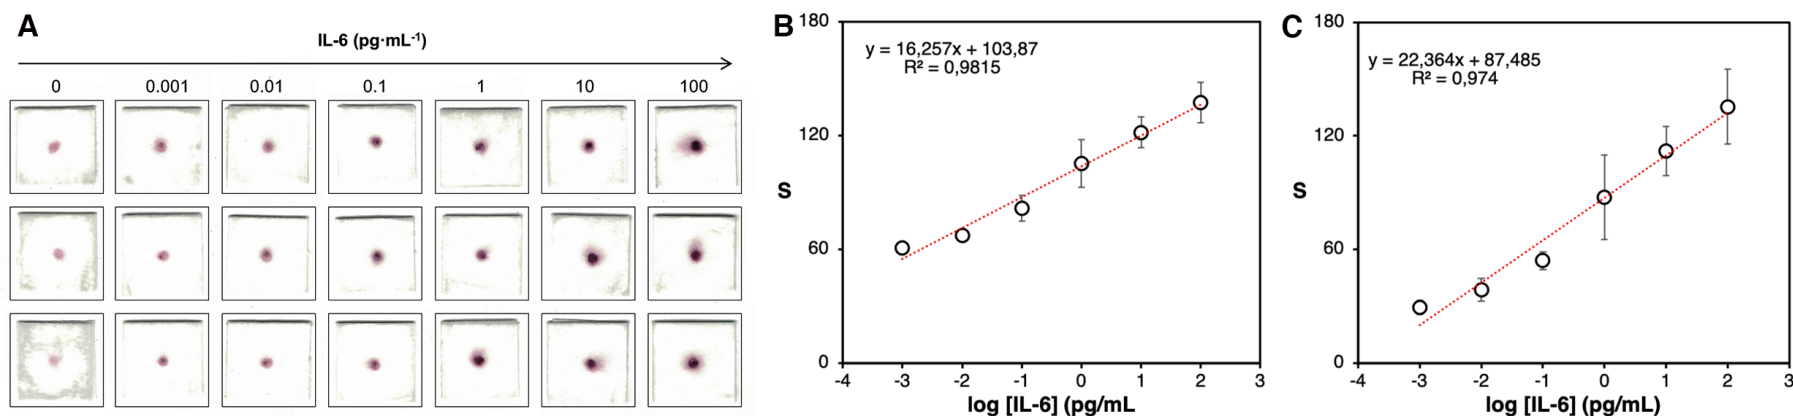

**Figure S2.** Calibration plot with IL-6 diluted in PBS-BSA ( $40 \mu\text{g mL}^{-1}$ ) instead of in PBS. (A) Scanned images of the paper biosensors; (B) Calibration plot obtained via densitometric analysis of images in (A) with ImageJ;  $S_{\text{blank}} + 3\sigma = 59$ ; (C) Calibration plot obtained when measuring the colorimetric signal of the same assays with our app;  $S_{\text{blank}} + 3\sigma = 23$ . Error bars are the standard deviation of the three independent experiments.

### References:

- (1) Khosravi, F.; Loeian, S. M.; Panchapakesan, B. Ultrasensitive Label-Free Sensing of IL-6 Based on PASE Functionalized Carbon Nanotube Micro-Arrays with RNA-Aptamers as Molecular Recognition Elements. *Biosensors* **2017**, 7 (2). <https://doi.org/10.3390/bios7020017>.
- (2) Diacci, C.; Berto, M.; Di Lauro, M.; Bianchini, E.; Pinti, M.; Simon, D. T.; Biscarini, F.; Bortolotti, C. A. Label-Free Detection of

Interleukin-6 Using Electrolyte Gated Organic Field Effect Transistors. *Biointerphases* **2017**, *12* (5), 05F401.

<https://doi.org/10.1116/1.4997760>.

- (3) Militano, F.; Poerio, T.; Mazzei, R.; Salerno, S.; Bartolo, L. De; Giorno, L. Development of Biohybrid Immuno-Selective Membranes for Target Antigen Recognition. *Biosens. Bioelectron.* **2017**, *92* (November 2016), 54–60. <https://doi.org/10.1016/j.bios.2017.02.003>.
- (4) Yin, B.; Zheng, W.; Dong, M.; Yu, W.; Chen, Y.; Joo, S. W.; Jiang, X. An Enzyme-Mediated Competitive Colorimetric Sensor Based on Au@Ag Bimetallic Nanoparticles for Highly Sensitive Detection of Disease Biomarkers. *Analyst* **2017**, *142* (16), 2954–2960. <https://doi.org/10.1039/c7an00779e>.
- (5) Wu, J.; Chen, Y.; Yang, M.; Wang, Y.; Zhang, C.; Yang, M.; Sun, J.; Xie, M.; Jiang, X. Streptavidin-Biotin-Peroxidase Nanocomplex-Amplified Microfluidics Immunoassays for Simultaneous Detection of Inflammatory Biomarkers. *Anal. Chim. Acta* **2017**, *982*, 138–147. <https://doi.org/10.1016/j.aca.2017.05.031>.
- (6) Zhu, J.; He, J.; Verano, M.; Brimmo, A. T.; Glia, A.; Qasaimeh, M. A.; Chen, P.; Aleman, J. O.; Chen, W. An Integrated Adipose-Tissue-on-Chip Nanoplasmonic Biosensing Platform for Investigating Obesity-Associated Inflammation. *Lab Chip* **2018**, *18* (23), 3550–3560. <https://doi.org/10.1039/c8lc00605a>.
- (7) Chen, H.; Li, J.; Zhang, X.; Li, X.; Yao, M.; Zheng, G. Automated in Vivo Nanosensing of Breath-Borne Protein Biomarkers. *Nano Lett.* **2018**, *18* (8), 4716–4726. <https://doi.org/10.1021/acs.nanolett.8b01070>.
- (8) Zhang, K.; Liu, G.; Goldys, E. M. Robust Immunosensing System Based on Biotin-Streptavidin Coupling for Spatially Localized Femtogram ML–1 Level Detection of Interleukin-6. *Biosens. Bioelectron.* **2018**, *102*, 80–86. <https://doi.org/10.1016/j.bios.2017.11.023>.
- (9) Wei, H.; Ni, S.; Cao, C.; Yang, G.; Liu, G. Graphene Oxide Signal Reporter Based Multifunctional Immunosensing Platform for Amperometric Profiling of Multiple Cytokines in Serum. *ACS Sensors* **2018**, *3* (8), 1553–1561. <https://doi.org/10.1021/acssensors.8b00365>.
- (10) Gentili, D.; D'Angelo, P.; Militano, F.; Mazzei, R.; Poerio, T.; Brucale, M.; Tarabella, G.; Bonetti, S.; Marasso, S. L.; Cocuzza, M.; et al. Integration of Organic Electrochemical Transistors and Immuno-Affinity Membranes for Label-Free Detection of Interleukin-6 in the

Physiological Concentration Range through Antibody-Antigen Recognition. *J. Mater. Chem. B* **2018**, *6* (33), 5400–5406.

<https://doi.org/10.1039/c8tb01697f>.

- (11) Sabaté, J.; Henry, O. Y. F.; Jolly, P.; Ingber, D. E. An Antifouling Coating That Enables Affinity-Based Electrochemical Biosensing in Complex Biological Fluids. *Nat. Nanotechnol.* **2019**, *14* (December), 1143–1149. <https://doi.org/10.1038/s41565-019-0566-z>.
- (12) Fabri-Faja, N.; Calvo-Lozano, O.; Dey, P.; Terborg, R. A.; Estevez, M. C.; Belushkin, A.; Yesilköy, F.; Duempelmann, L.; Altug, H.; Pruneri, V.; et al. Early Sepsis Diagnosis via Protein and MiRNA Biomarkers Using a Novel Point-of-Care Photonic Biosensor. *Anal. Chim. Acta* **2019**, *1077*, 232–242. <https://doi.org/10.1016/j.aca.2019.05.038>.
- (13) Wang, Y.; Sun, J.; Hou, Y.; Zhang, C.; Li, D.; Li, H.; Yang, M.; Fan, C.; Sun, B. A SERS-Based Lateral Flow Assay Biosensor for Quantitative and Ultrasensitive Detection of Interleukin-6 in Unprocessed Whole Blood. *Biosens. Bioelectron.* **2019**, *141* (June), 111432. <https://doi.org/10.1016/j.bios.2019.111432>.
- (14) Tertis, M.; Ionut, P.; Bogdan, D.; Suciu, M.; Graur, F.; Cristea, C. Biosensors and Bioelectronics Impedimetric Aptasensor for the Label-Free and Selective Detection of Interleukin-6 for Colorectal Cancer Screening. *Biosens. Bioelectron.* **2019**, *137* (April), 123–132. <https://doi.org/10.1016/j.bios.2019.05.012>.
- (15) Huang, D.; Ying, H.; Jiang, D.; Liu, F.; Tian, Y.; Du, C.; Zhang, L.; Pu, X. Rapid and Sensitive Detection of Interleukin-6 in Serum via Time-Resolved Lateral Flow Immunoassay. *Anal. Biochem.* **2020**, *588* (October 2019), 113468. <https://doi.org/10.1016/j.ab.2019.113468>.
- (16) Borse, V.; Srivastava, R. Fluorescence Lateral Flow Immunoassay Based Point-of-Care Nanodiagnosics for Orthopedic Implant-Associated Infection. *Sensors Actuators, B Chem.* **2019**, *280*, 24–33. <https://doi.org/10.1016/j.snb.2018.10.034>.
- (17) Hao, Z.; Pan, Y.; Shao, W.; Lin, Q.; Zhao, X. Graphene-Based Fully Integrated Portable Nanosensing System for on-Line Detection of Cytokine Biomarkers in Saliva. *Biosens. Bioelectron.* **2019**, *134*, 16–23. <https://doi.org/10.1016/j.bios.2019.03.053>.
- (18) Russell, C.; Ward, A. C.; Vezza, V.; Hoskisson, P.; Alcorn, D.; Steenson, D. P.; Corrigan, D. K. Development of a Needle Shaped Microelectrode for Electrochemical Detection of the Sepsis Biomarker Interleukin-6 (IL-6) in Real Time. *Biosens. Bioelectron.* **2019**, *126*, 806–814. <https://doi.org/10.1016/j.bios.2018.11.053>.

- (19) Nie, R.; Huang, J.; Xu, X.; Yang, L. A Portable Pencil-like Immunosensor for Point-of-Care Testing of Inflammatory Biomarkers. *Anal. Bioanal. Chem.* **2020**, *412*, 3231–3239. <https://doi.org/10.1007/s00216-020-02582-z>.
- (20) Aydın, E. B. Highly Sensitive Impedimetric Immunosensor for Determination of Interleukin 6 as a Cancer Biomarker by Using Conjugated Polymer Containing Epoxy Side Groups Modified Disposable ITO Electrode. *Talanta* **2020**, *215*, 120909. <https://doi.org/10.1016/j.talanta.2020.120909>.
- (21) Alba-Patiño, A.; Russell, S. M.; Borges, M.; Pazos-Perez, N.; Alvarez-Puebla, R. A.; de la Rica, R. Nanoparticle-Based Mobile Biosensors for the Rapid Detection of Sepsis Biomarkers in Whole Blood. *Nanoscale Adv.* **2020**, *2*, 253–1260. <https://doi.org/10.1039/d0na00026d>.
- (22) Aydın, E. B.; Aydın, M.; Sezgintürk, M. K. The Development of an Ultra-Sensitive Electrochemical Immunosensor Using a PPy-NHS Functionalized Disposable ITO Sheet for the Detection of Interleukin 6 in Real Human Serums. *New J. Chem.* **2020**. <https://doi.org/10.1039/d0nj03183f>.
- (23) Chen, P.; Chung, M. T.; McHugh, W.; Nidetz, R.; Li, Y.; Fu, J.; Cornell, T. T.; Shanley, T. P.; Kurabayashi, K. Multiplex Serum Cytokine Immunoassay Using Nanoplasmonic Biosensor Microarrays. *ACS Nano* **2015**, *9* (4), 4173–4181. <https://doi.org/10.1021/acsnano.5b00396>.
- (24) Tang, C. K.; Vaze, A.; Shen, M.; Rusling, J. F. High-Throughput Electrochemical Microfluidic Immunoarray for Multiplexed Detection of Cancer Biomarker Proteins. *ACS Sensors* **2016**, *1* (8), 1036–1043. <https://doi.org/10.1021/acssensors.6b00256>.
